# Supplementary material
Source: publisher figshare collection journal article supplement (https://acs.figshare.com/ndownloader/files/14116592)
Supplement: Supplementary file 1 [file 14116592]

Compound_ID	SMILES	Adjuvant activity?	Stimulating IgG1?	Stimulating IgG2a?
7	CC1(C)C[C@H]2C([C@@]3(C)C[C@@H](O)[C@@]2(C(O[C@H]4[C@H](O[C@H]5[C@H](O)[C@H](O[C@@H]6O[C@H](CO)[C@@H](O)[C@H](O)[C@H]6O)[C@@H](O[C@@H]7OC[C@@H](O)[C@H](O[C@@H]8OC[C@@H](O)[C@H](O)[C@H]8O)[C@H]7O)[C@H](C)O5)[C@@H](O)[C@@H](O)[C@@H](C)O4)=O)CC1)=CC[C@H]9[C@@]3(C)CC[C@H]%10[C@](C)(C=O)[C@@H](O[C@@H]%11O[C@H](C(NCCCCCCCCCCCC)=O)[C@@H](O)[C@H](O[C@H]%12[C@H](O)[C@@H](O)[C@H](O)CO%12)[C@H]%11O[C@H]%13[…	Yes	Yes	Yes
13	O[C@@H]1[C@@H](O[C@@H]2OC[C@@H](OCC3=CC=CC=C3)[C@H](O[C@@H]4OC[C@@H](OCC5=CC=CC=C5)[C@H](OCC6=CC=CC=C6)[C@H]4OCC7=CC=CC=C7)[C@H]2OCC8=CC=CC=C8)[C@H](C)O[C@@H](O/C=C/C)[C@@H]1OCC9=CC=CC=C9
15	C[C@@H]1O[C@@H](O/C=C/C)[C@H](OCC2=CC=CC=C2)[C@H](O[C@@H]3O[C@H](COCC4=CC=CC=C4)[C@@H](OCC5=CC=CC=C5)[C@H](OCC6=CC=CC=C6)[C@H]3OCC7=CC=CC=C7)[C@H]1O[C@@H]8OC[C@@H](OCC9=CC=CC=C9)[C@H](O[C@@H]%10OC[C@@H](OCC%11=CC=CC=C%11)[C@H](OCC%12=CC=CC=C%12)[C@H]%10OCC%13=CC=CC=C%13)[C@H]8OCC%14=CC=CC=C%14
16	O[C@H]1[C@H](O/C=C/C)O[C@H](C)[C@H](OC(C)=O)[C@@H]1OC(C)=O
17	C[C@@H]1O[C@@H](O[C@H]2[C@@H](O/C=C/C)O[C@H](C)[C@H](OC(C)=O)[C@@H]2OC(C)=O)[C@H](OCC3=CC=CC=C3)[C@H](O[C@@H]4O[C@H](COCC5=CC=CC=C5)[C@@H](OCC6=CC=CC=C6)[C@H](OCC7=CC=CC=C7)[C@H]4OCC8=CC=CC=C8)[C@H]1O[C@@H]9OC[C@@H](OCC%10=CC=CC=C%10)[C@H](O[C@@H]%11OC[C@@H](OCC%12=CC=CC=C%12)[C@H](OCC%13=CC=CC=C%13)[C@H]%11OCC%14=CC=CC=C%14)[C@H]9OCC%15=CC=CC=C%15
24	C[C@H]1O[C@@H](OC([C@]2(CCC(C)(C)C3)[C@@H]3C([C@@]4(C)C[C@H]2O[Si](CC)(CC)CC)=CC[C@H]5[C@@]4(C)CC[C@H]6[C@](C)(C=O)[C@@H](O[C@@H]7O[C@H](C(OCC8=CC=CC=C8)=O)[C@@H](O[Si](CC)(CC)CC)[C@H](O[C@H]9[C@H](O[Si](CC)(CC)CC)[C@@H](O[Si](CC)(CC)CC)[C@H](O[Si](CC)(CC)CC)CO9)[C@H]7O[C@H]%10[C@H](O[Si](CC)(CC)CC)[C@@H](O[Si](CC)(CC)CC)[C@@H](O[Si](CC)(CC)CC)[C@@H](CO[Si](CC)(CC)CC)O%10)CC[C@]56C)=O)[C@H](O[C@H…
